# Supplementary material for: Isovalent anion-induced electrochemical activity of doped Co3V2O8 for oxygen evolution reaction application
Source: Royal Society of Chemistry journal article supplement (doi:10.1039/d2dt01857h), 2022-01-01
Supplement: d2dt01857h1.pdf [file d2dt01857h1.pdf]

## Isovalent anion induced electrochemical activity in doped $\text{Co}_3\text{V}_2\text{O}_8$ for OER application

Maurya Gyanprakash D.<sup>1,2,\*</sup>, Gyan Prakash Sharma<sup>1,3</sup>, Prashant Kumar Gupta<sup>1,4</sup>

<sup>1</sup> Department of Chemical Engineering, Indian Institute of Technology, Kanpur-208016, India

<sup>2</sup> Department of Energy Science and Technology, Centre for Advanced Studies, Dr. A. P. J. Abdul Kalam Technical University, Jankipuram, Lucknow-226031, India

<sup>3</sup> Kanopy Techno Solutions Pvt Ltd, Techno Park, Kanpur- 208016, India

<sup>4</sup> Department of Chemical Engineering, Indian Institute of Technology, Jodhpur- 342037, India

\*Corresponding Author: [gyan@cas.res.in](mailto:gyan@cas.res.in)

### Supplementary Information:

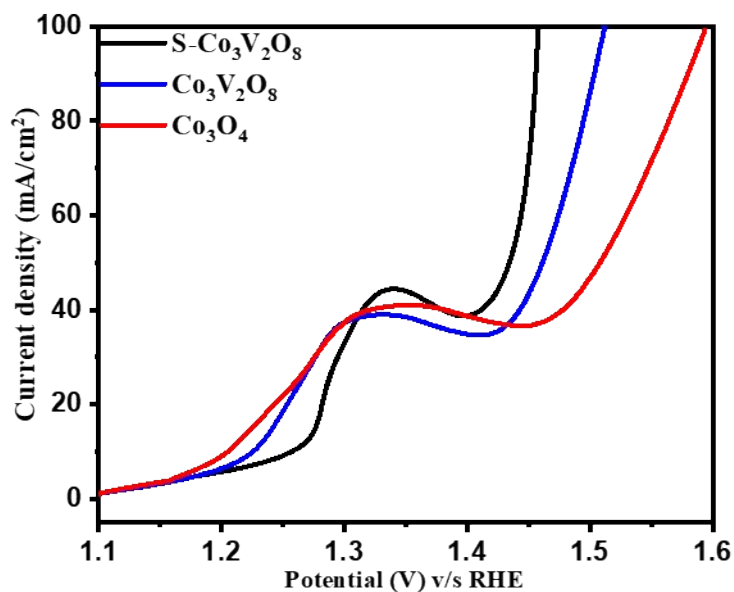

Fig S1: Polarisation curve of all samples towards the oxygen evolution reaction at 5mV/s scan rate in 0.1M NaOH electrolyte based on geometric surface area.

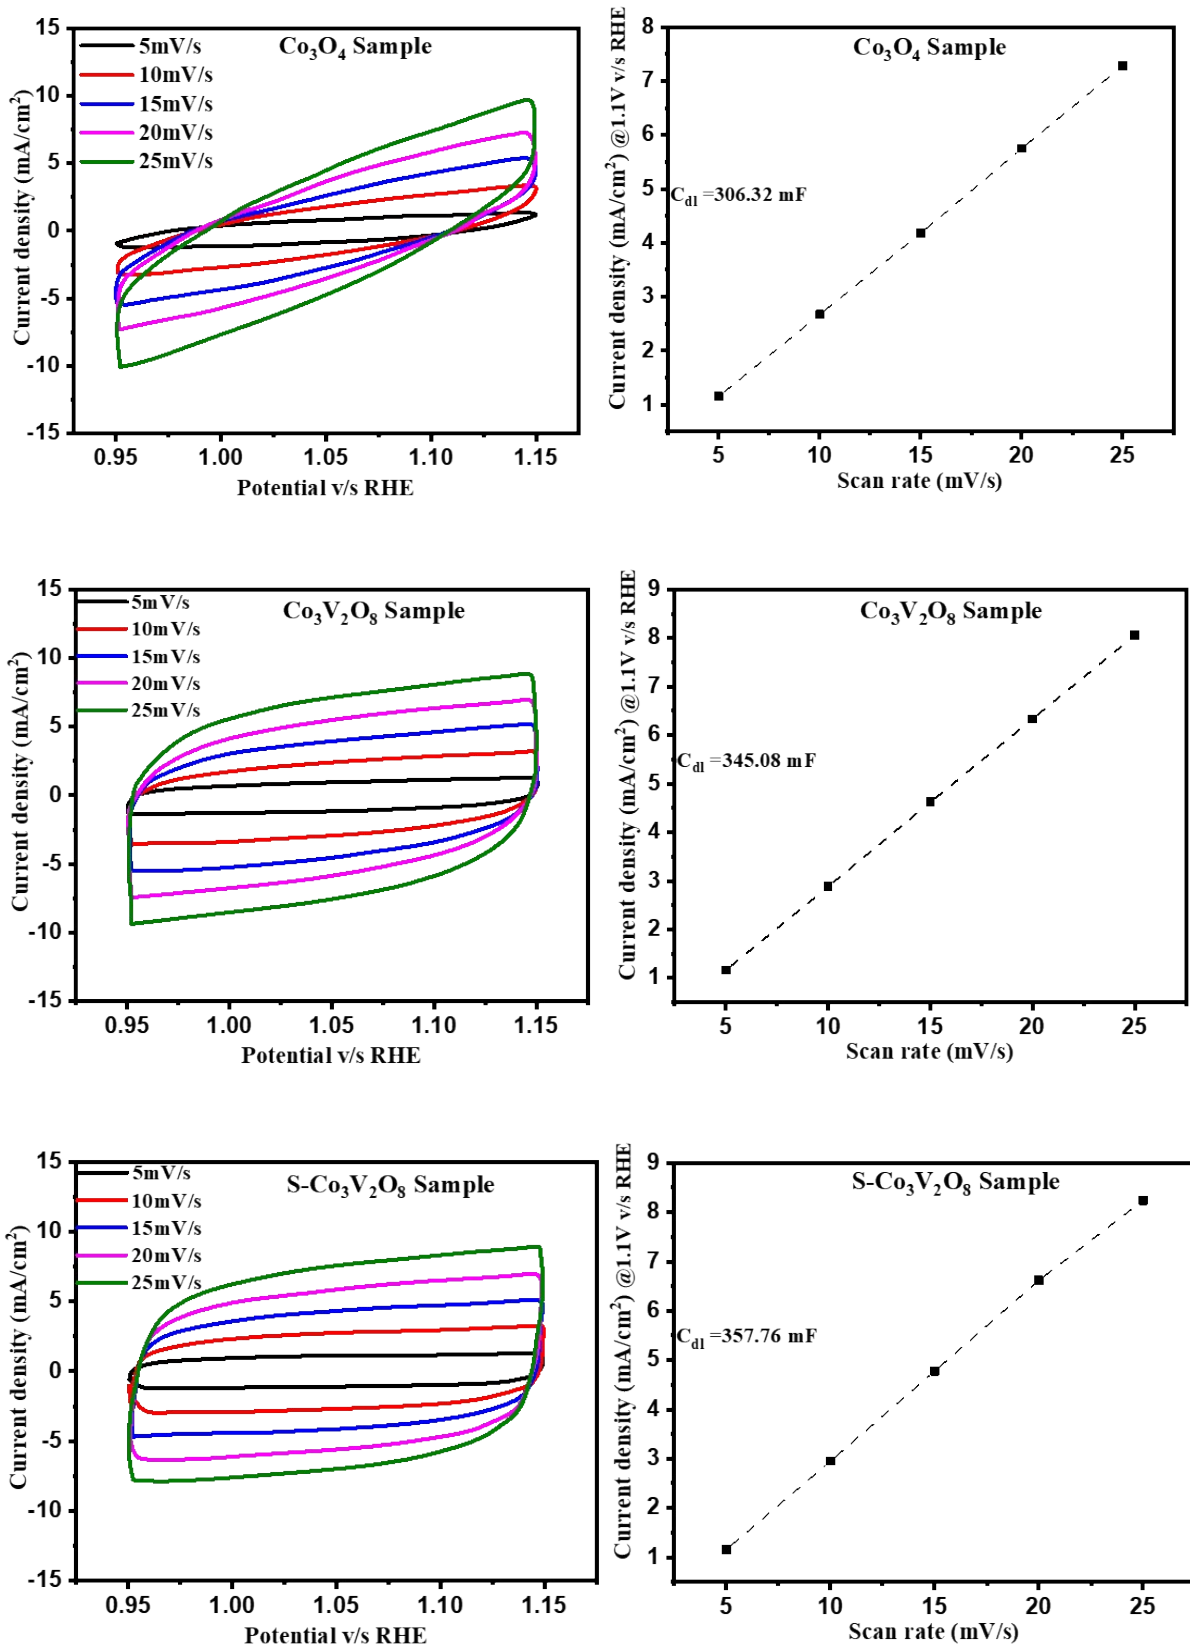

Fig. S2 Cyclic voltammogram of  $\text{Co}_3\text{O}_4$ ,  $\text{Co}_3\text{V}_2\text{O}_8$  and  $\text{S-Co}_3\text{V}_2\text{O}_8$  at different scan rate utilized for the determination of  $C_{dl}$ .

Electrochemical surface area (ECSA) estimation:

Double layer capacitance (C<sub>dl</sub>) = ECSA\* capacitance per unit surface area on standard electrode like Au (C<sub>Au</sub>)

$$ECSA = \frac{C_{dl}}{C_{Au}}$$

Here C<sub>Au</sub> is taken as 40 μF<sup>1</sup>.

References:

1. Horkans, J., Cahan, B.D. and Yeager, E., 1974. Electrode potential scanning ellipsometric spectroscopy: study of the formation of the anodic oxide film on noble metals. Surface Science, 46(1), pp.1-23.
